# Supplementary material
Source: publisher site journal article supplement (https://www.dovepress.com/article/318344)
Supplement: Supplementary file 1 [file get_supplementary_file.php]

**APPENDIX**

Appendix A - Description of Ingestible Event Marker (IEM) sensor

A new technology developed to track and provide real-time medication adherence information is becoming available. It is a prescription medicine (atypical antipsychotic) in tablet form with an Ingestible Event Marker (IEM) sensor inside it used in adults for the:

- Treatment of schizophrenia
- Treatment of bipolar I disorder alone or when used with the medicine lithium or valproate for: acute (short-term) treatment of manic or mixed episodes maintenance treatment
- Treatment of major depressive disorder (MDD) along with other antidepressant medicines

The system is intended to track when (what days and times during each day) your patient has taken the atypical antipsychotic that you prescribed. There may be a delay in the detection of the tablet. Adherence data are reported to the prescribing provider in dashboard format. The dashboard is a secure, web-based portal that gives you access to your patients’ medication ingestion information over time, as well as information about other health measures that your patient chooses to share such as vital statistics.

|  |  |  |  |  |  |  |  |  |  |  |  |  |  |  |  |  |  |  |  |
| --- | --- | --- | --- | --- | --- | --- | --- | --- | --- | --- | --- | --- | --- | --- | --- | --- | --- | --- | --- |
|  |  |  |  |  |  |  |  |  |  |  |  |  |  |  |  |  |  |  |  |
|  |  |  |  |  |  |  |  |  |  |  |  |  |  |  |  |  |  |  |  |
| **Appendix B . Questionnaire items used in factor analysis.** | | | | |  |  |  |  |  |  |  |  |  |  |  |  |  |  |  |
| Domain | | | | Question Tag | Question Text | |  |  |  |  |  |  |  |  |  |  |  |  |  |
| Perspectives on the value of adherence | | | | IMPROVE | Methods for improving adherence with antipsychotics greatly reduces the health, social, and financial consequences of [disorder]¥. | | | | | | | | | | | | | | |
| APPS_WRK | Digital medicine applications (apps other than the E.H.R.) typically work | | | | | | | | | | | | | | |
| DISRUPT | The following items refer to methods of direct assessment of medication adherence among my (disorder) patients that exceeds patient and collateral self-report. Here we are talking about methods that directly assess whether and when medications were taken. Please rate your level of agreement with the following statements by marking in the box that applies. Direct assessment (urine, blood levels, observed dosing) of medication adherence among my patients could disrupt my clinical relationship with them. | | | | | | | | | | | | | | |
| Concerns about measuring adherence | | | | MONITOR | I am concerned that I am not able to adequately monitor adherence levels in my patients. | | | | | | | | | | | | | | |
| SELFRPT | I am concerned about the validity of patient self-reporting of medication adherence. | | | | | | | | | | | | | | |
| TIME | I have adequate time to assess medication adherence. | | | | | | | | | | | | | | |
| Views toward digital health technologies | | | | EHR_EASY | My current E.H.R. system is easy to use in clinical practice | | | | | | | | | | | | | | |
| EHR_USEFUL | The clinical patient information stored in my E.H.R. is more accessible and useful than any paper chart | | | | | | | | | | | | | | |
| APPS | Digital medicine applications (apps other than the E.H.R.) typically improve efficiency. | | | | | | | | | | | | | | |
| Views on payer role/reimbursement | | | | PYRSBEN | Payers will be among those to benefit from adherence assessing technology. | | | | | | | | | | | | | | |
| MGDCARE | Managed care should reimburse for monitoring medication adherence. | | | | | | | | | | | | | | |
| ¥ Disorder can be MDD, BD, SC | | |  |  |  |  |  |  |  |  |  |  |  |  |  |  |  |  |  |
| Extraction Method: Principal Component Analysis. | | | | |  |  |  |  |  |  |  |  |  |  |  |  |  |  |  |
| Rotation Method: Oblimin with Kaiser Normalization. | | | | |  |  |  |  |  |  |  |  |  |  |  |  |  |  |  |
|  |  |  |  |  |  |  |  |  |  |  |  |  |  |  |  |  |  |  |  |
|  |  |  |  |  |  |  |  |  |  |  |  |  |  |  |  |  |  |  |  |
